# Supplementary material
Source: PubMed Central journal article supplement (PMC6736611)
Supplement: NIHMS1038261-supplement-SI.pdf [file NIHMS1038261-supplement-SI.pdf]

## A Pictorial Dictionary of Ovaloid Surfaces

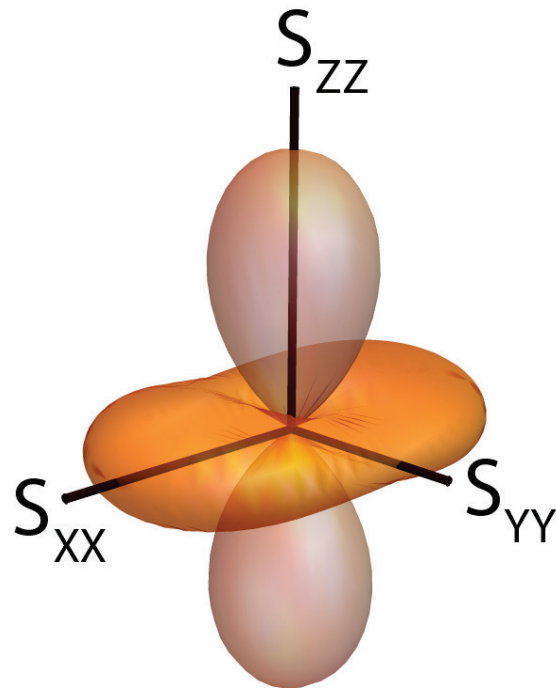

$\{S_{xx}, S_{yy}, S_{zz}\}$

Indexed by principal components  $\{S_{xx}, S_{yy}, S_{zz}\}$

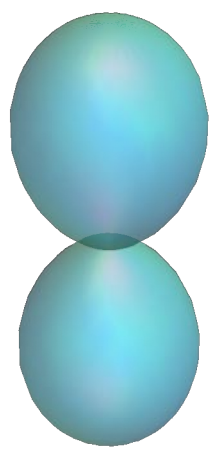

{0., 0., 100}

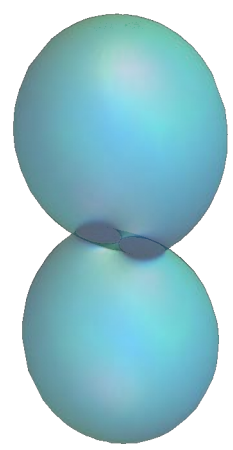

{20., 0., 100}

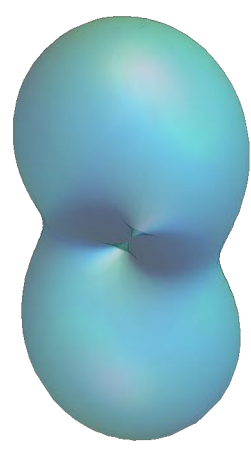

{40., 0., 100}

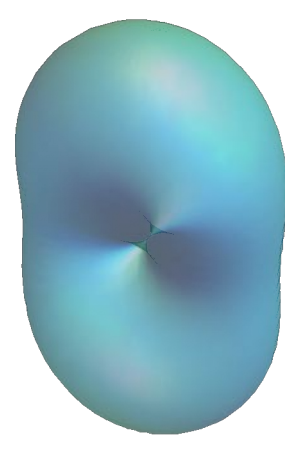

{60., 0., 100}

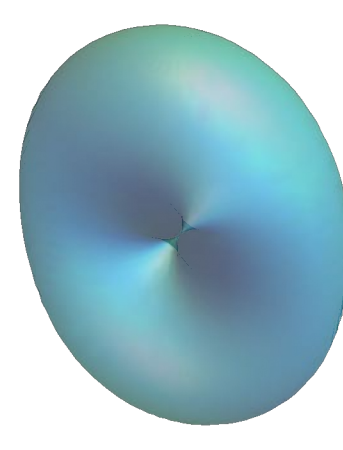

{80., 0., 100}

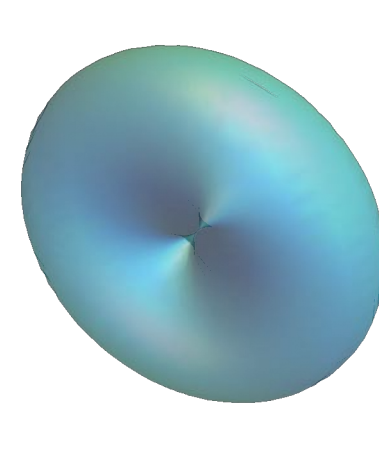

{100., 0., 100}

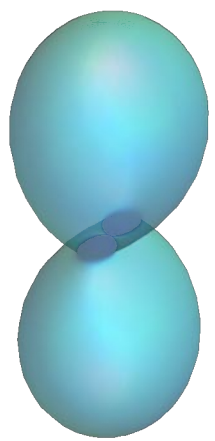

{0., 20., 100}

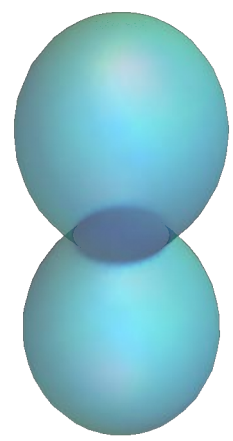

{20., 20., 100}

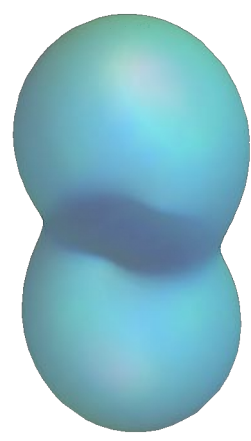

{40., 20., 100}

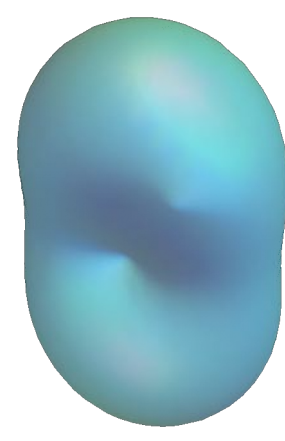

{60., 20., 100}

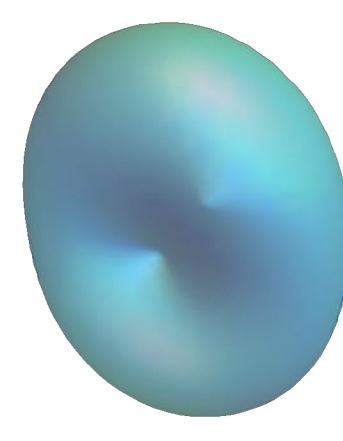

{80., 20., 100}

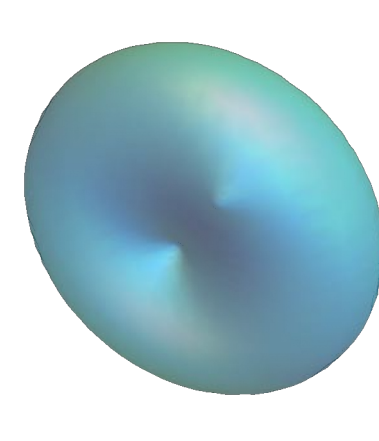

{100., 20., 100}

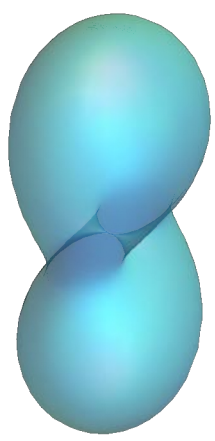

{0., 40., 100}

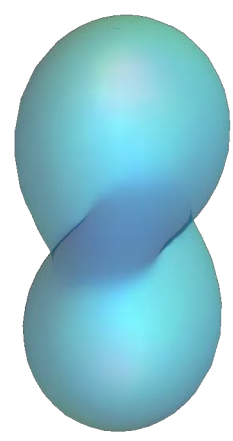

{20., 40., 100}

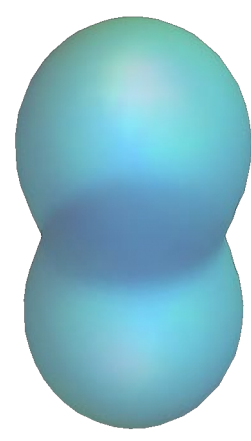

{40., 40., 100}

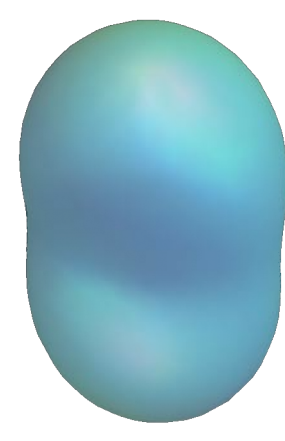

{60., 40., 100}

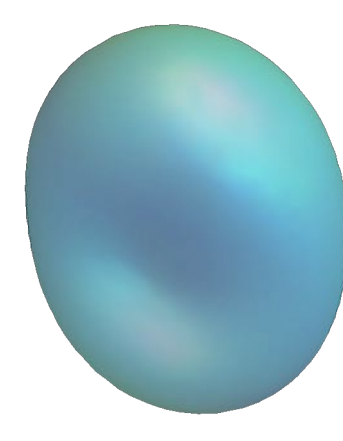

{80., 40., 100}

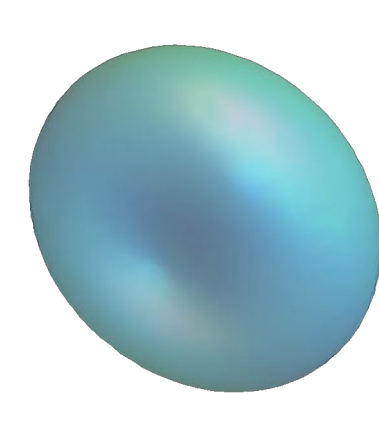

{100., 40., 100}

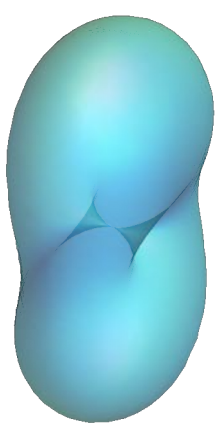

{0., 60., 100}

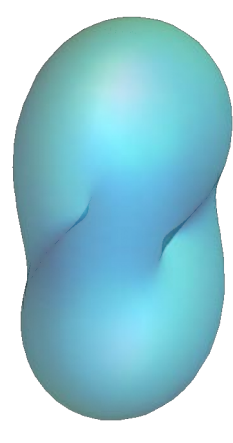

{20., 60., 100}

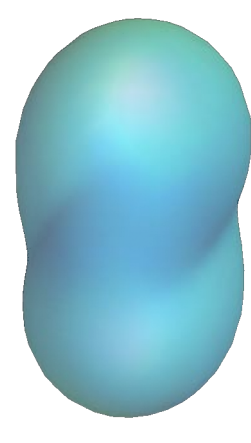

{40., 60., 100}

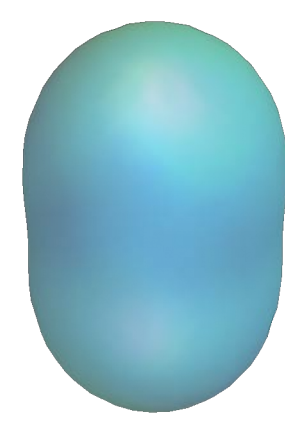

{60., 60., 100}

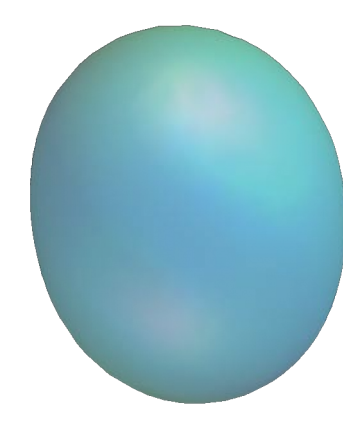

{80., 60., 100}

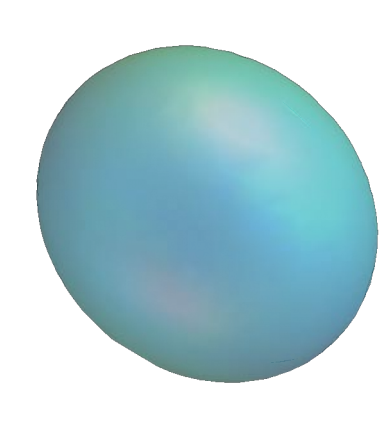

{100., 60., 100}

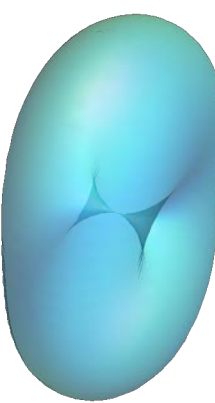

{0., 80., 100}

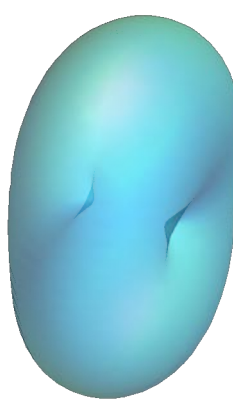

{20., 80., 100}

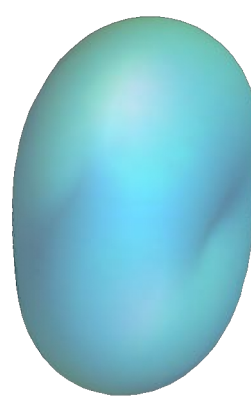

{40., 80., 100}

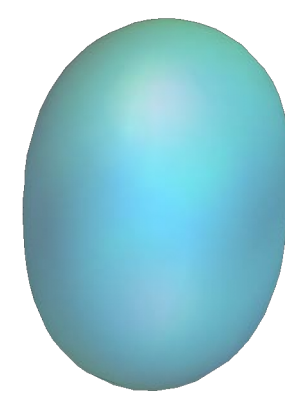

{60., 80., 100}

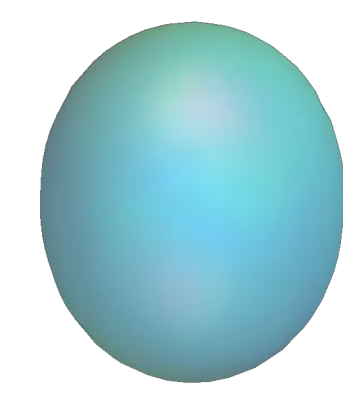

{80., 80., 100}

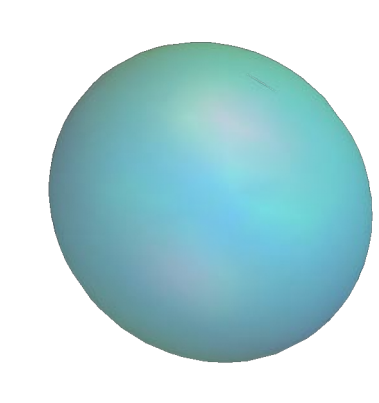

{100., 80., 100}

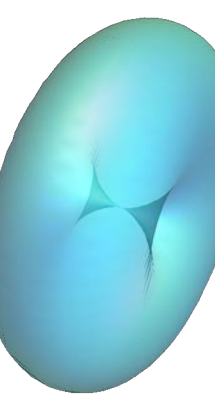

{0., 100., 100}

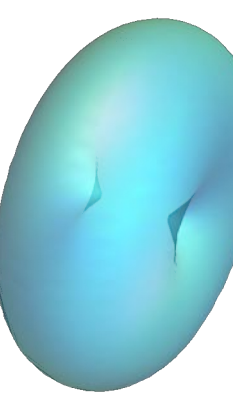

{20., 100., 100}

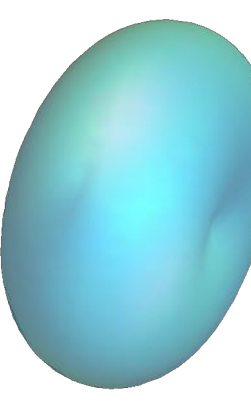

{40., 100., 100}

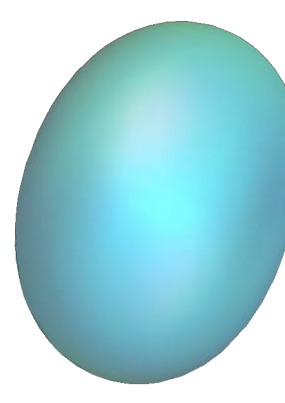

{60., 100., 100}

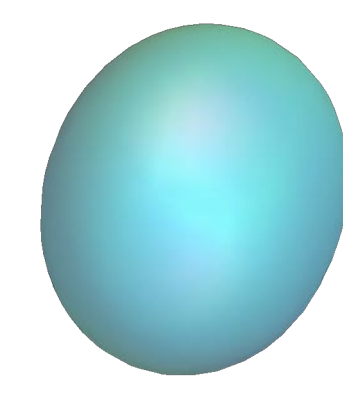

{80., 100., 100}

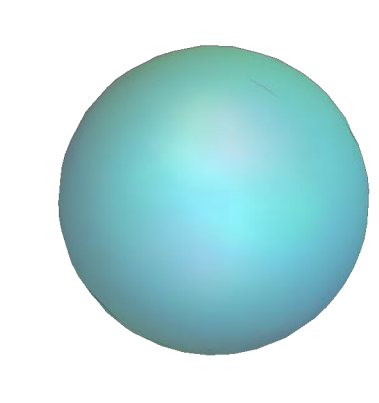

{100., 100., 100}

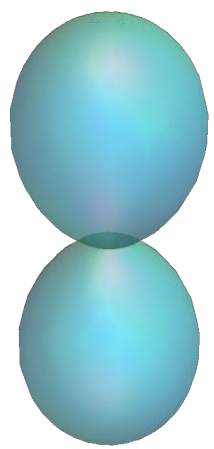

{0., 0., 100}

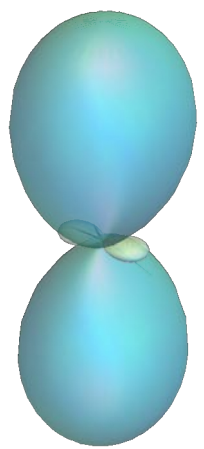

{-20., 0., 100}

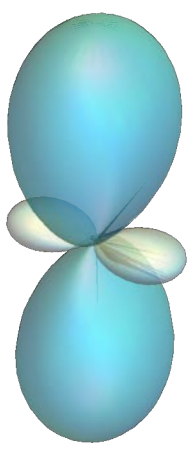

{-40., 0., 100}

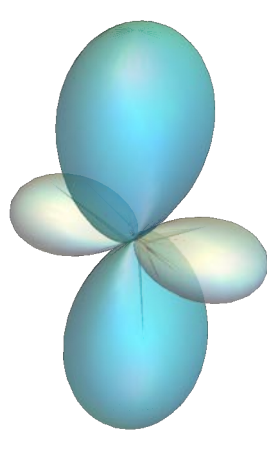

{-60., 0., 100}

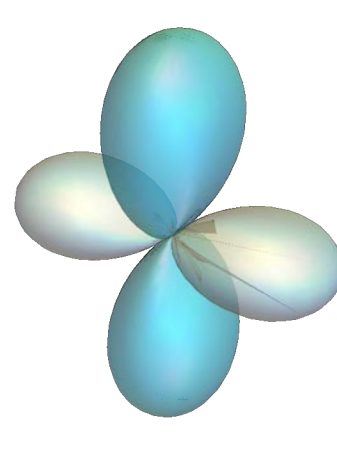

{-80., 0., 100}

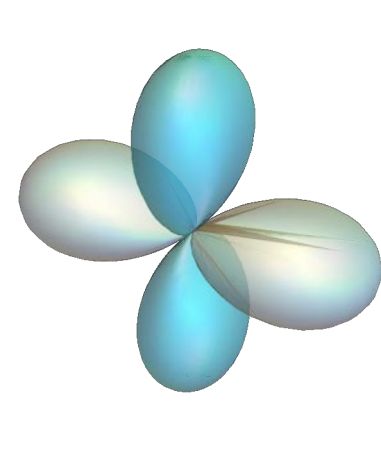

{-100., 0., 100}

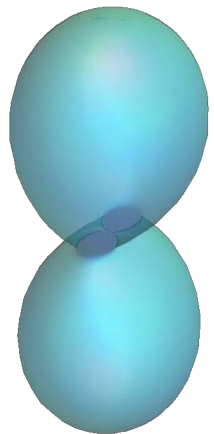

{0., 20., 100}

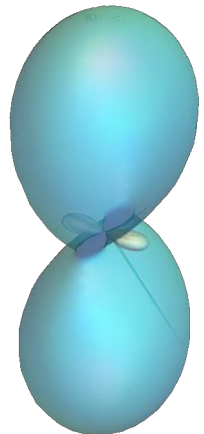

{-20., 20., 100}

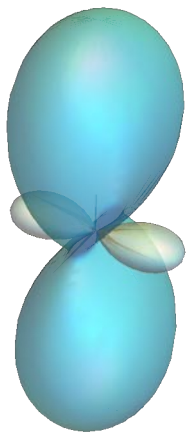

{-40., 20., 100}

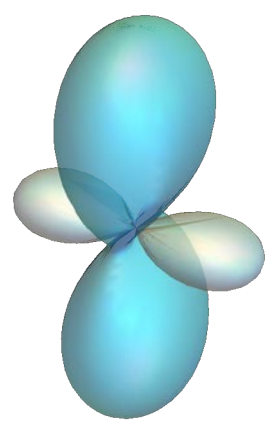

{-60., 20., 100}

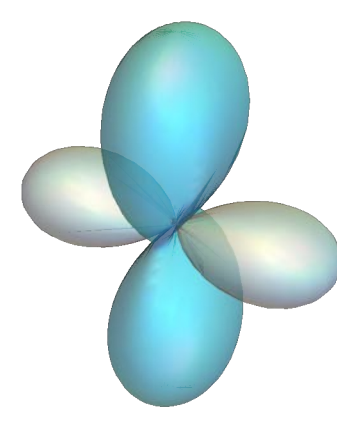

{-80., 20., 100}

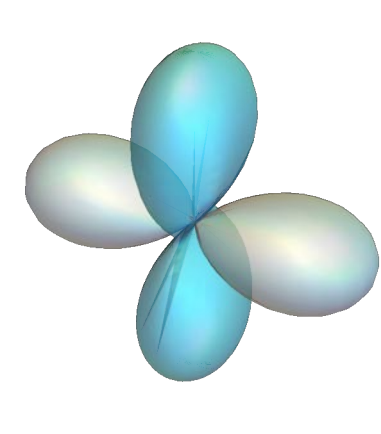

{-100., 20., 100}

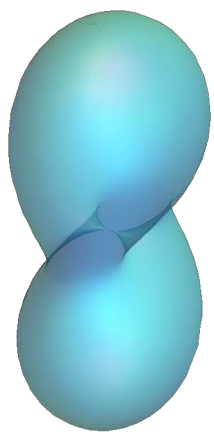

{0., 40., 100}

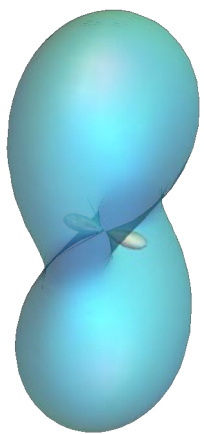

{-20., 40., 100}

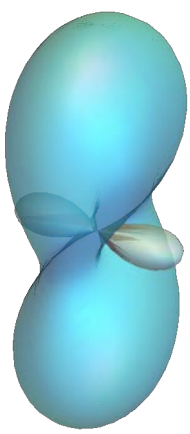

{-40., 40., 100}

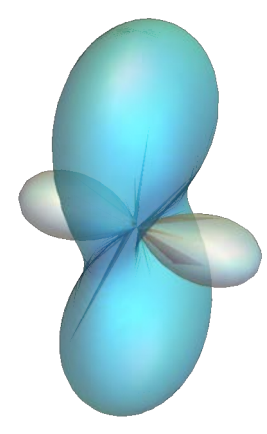

{-60., 40., 100}

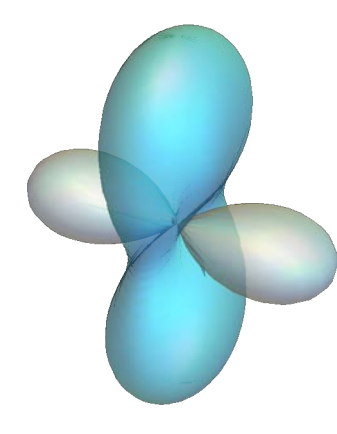

{-80., 40., 100}

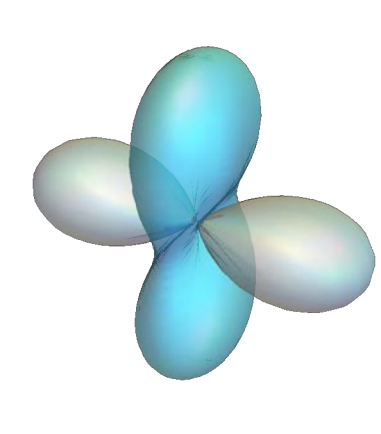

{-100., 40., 100}

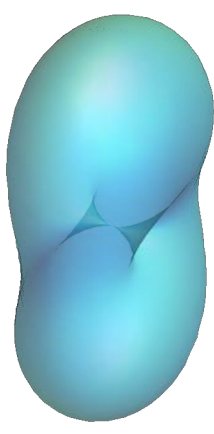

{0., 60., 100}

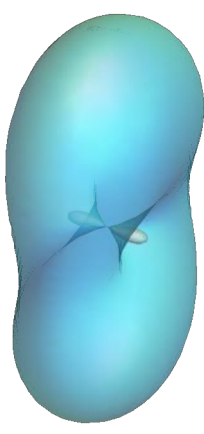

{-20., 60., 100}

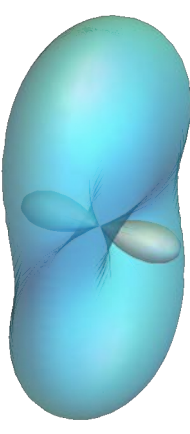

{-40., 60., 100}

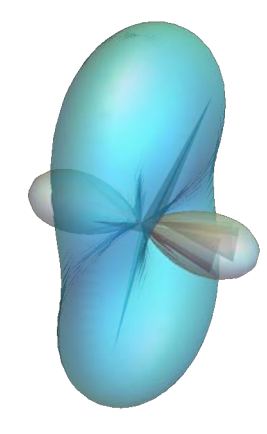

{-60., 60., 100}

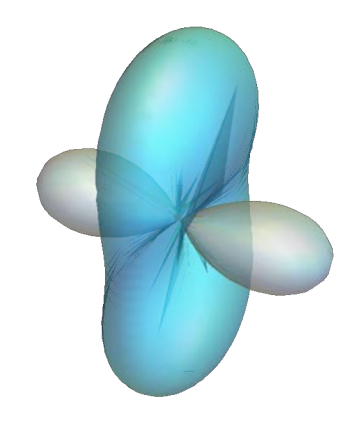

{-80., 60., 100}

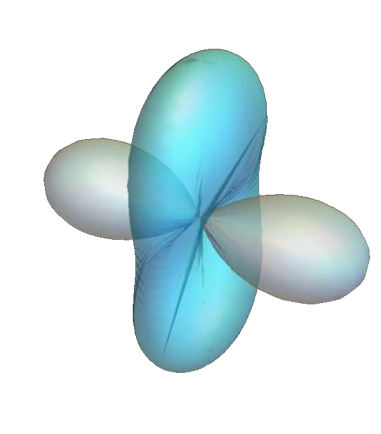

{-100., 60., 100}

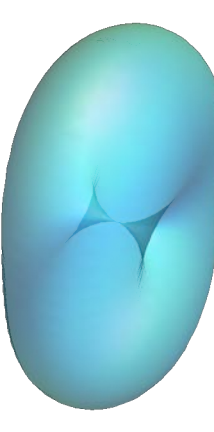

{0., 80., 100}

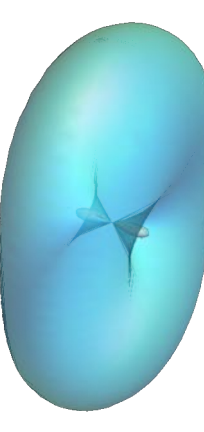

{-20., 80., 100}

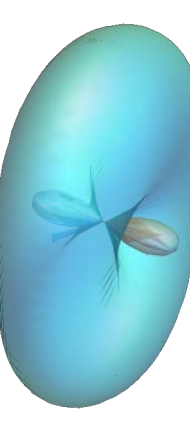

{-40., 80., 100}

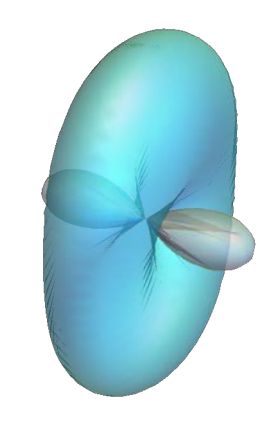

{-60., 80., 100}

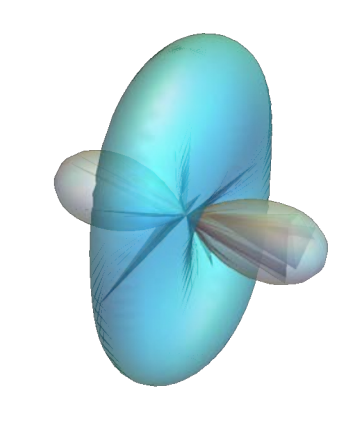

{-80., 80., 100}

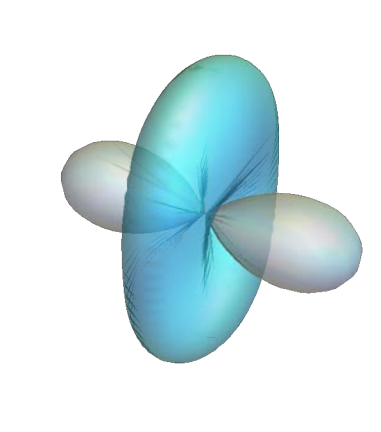

{-100., 80., 100}

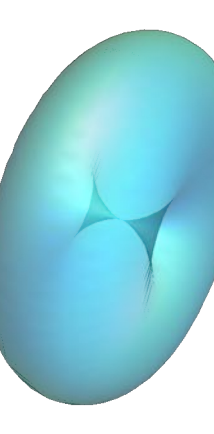

{0., 100., 100}

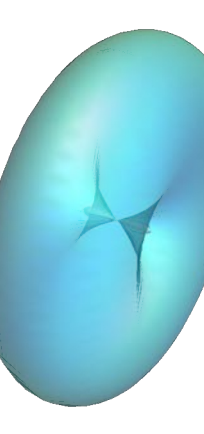

{-20., 100., 100}

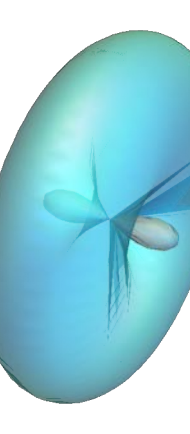

{-40., 100., 100}

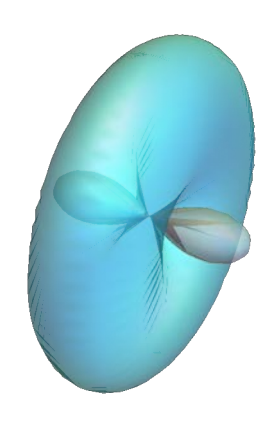

{-60., 100., 100}

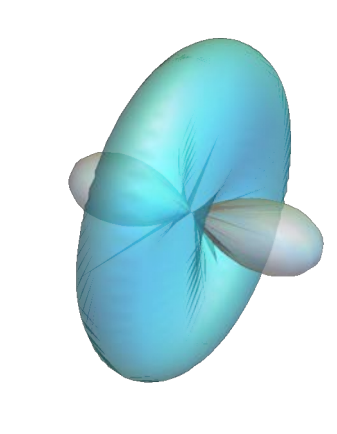

{-80., 100., 100}

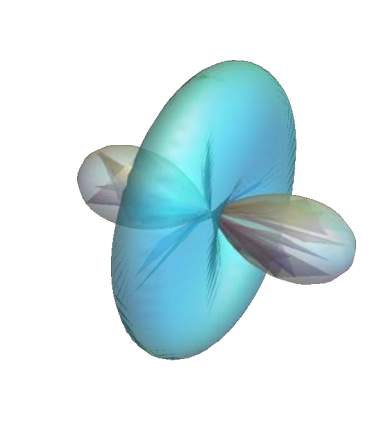

{-100., 100., 100}

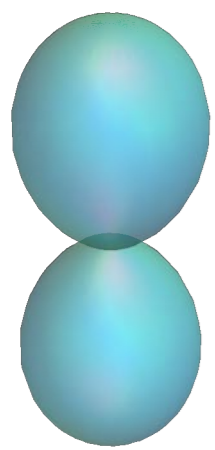

{0., 0., 100}

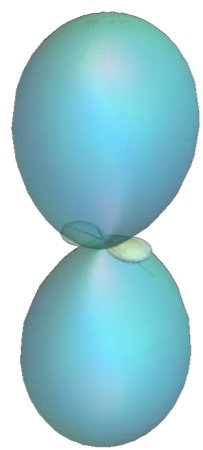

{-20., 0., 100}

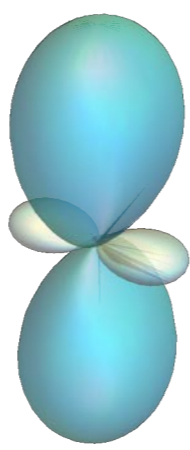

{-40., 0., 100}

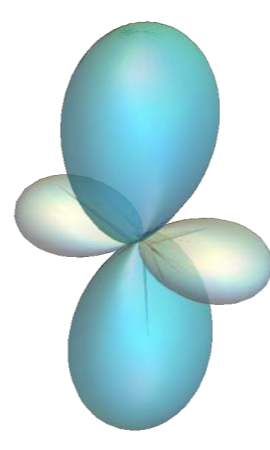

{-60., 0., 100}

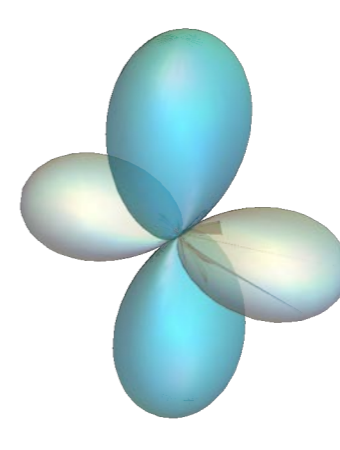

{-80., 0., 100}

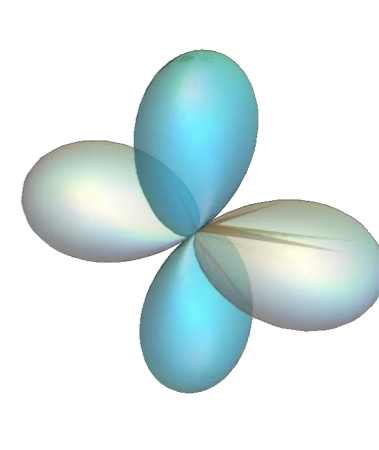

{-100., 0., 100}

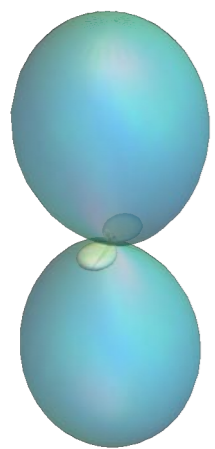

{0., -20., 100}

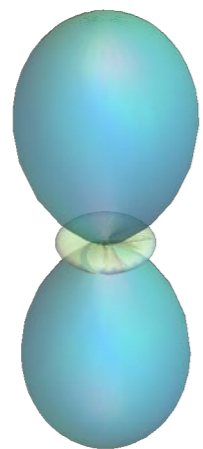

{-20., -20., 100}

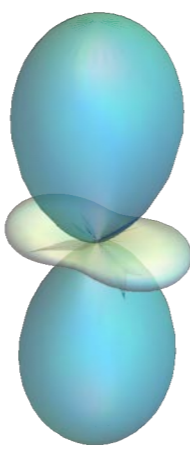

{-40., -20., 100}

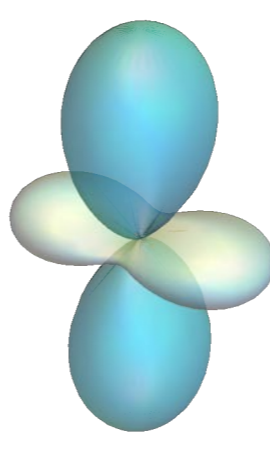

{-60., -20., 100}

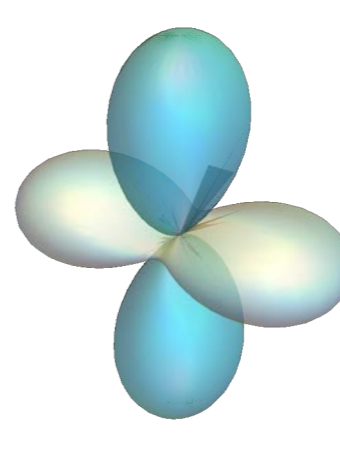

{-80., -20., 100}

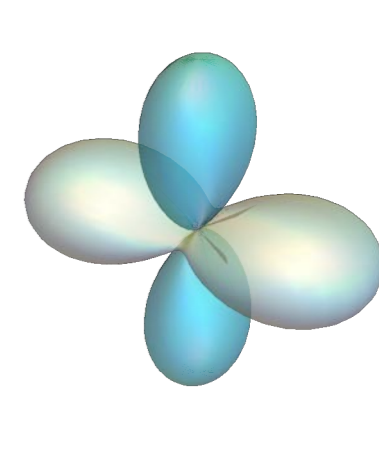

{-100., -20., 100}

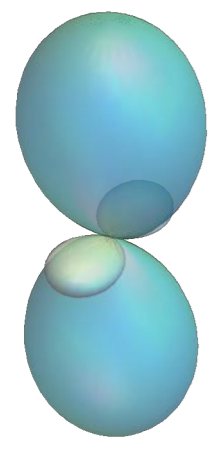

{0., -40., 100}

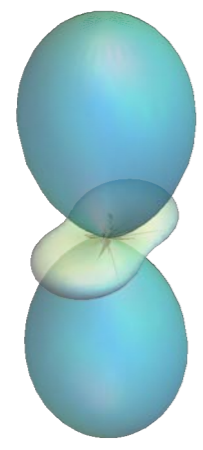

{-20., -40., 100}

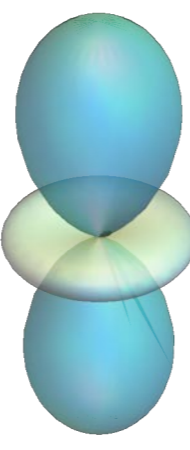

{-40., -40., 100}

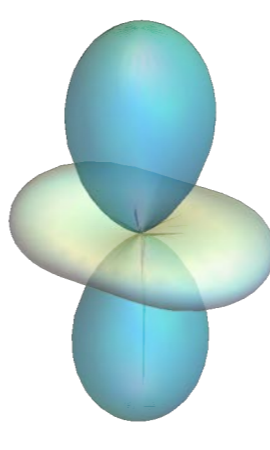

{-60., -40., 100}

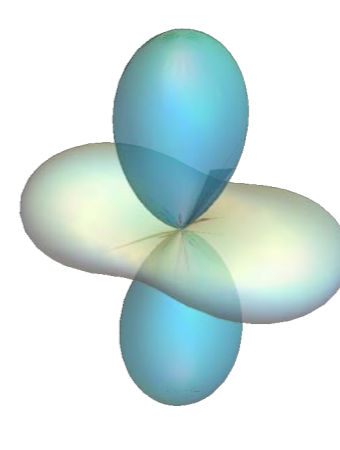

{-80., -40., 100}

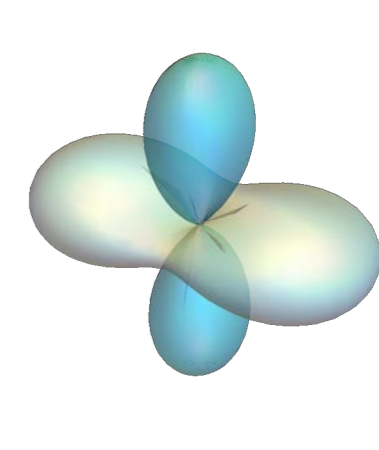

{-100., -40., 100}

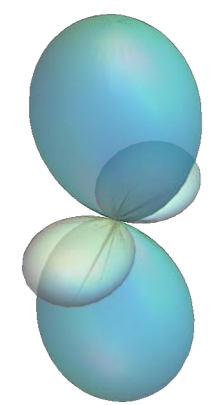

{0., -60., 100}

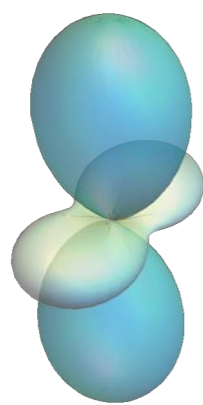

{-20., -60., 100}

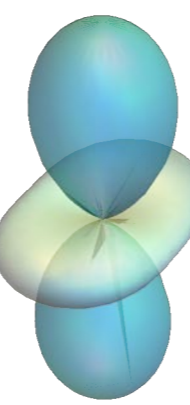

{-40., -60., 100}

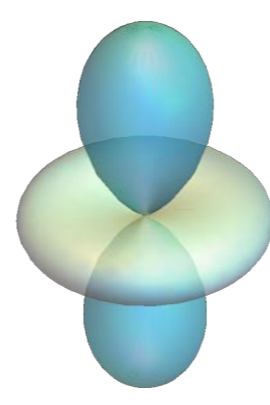

{-60., -60., 100}

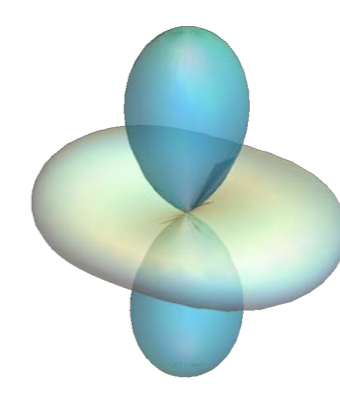

{-80., -60., 100}

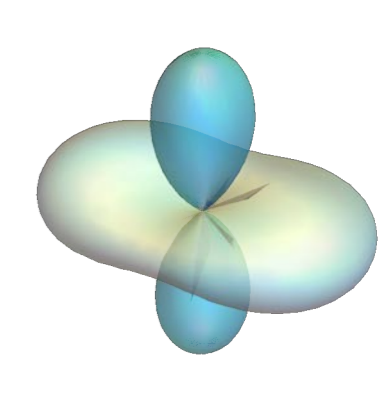

{-100., -60., 100}

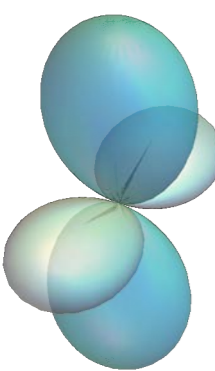

{0., -80., 100}

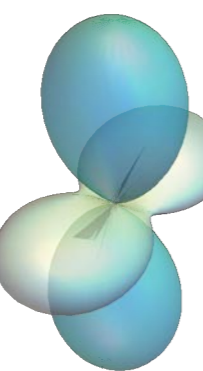

{-20., -80., 100}

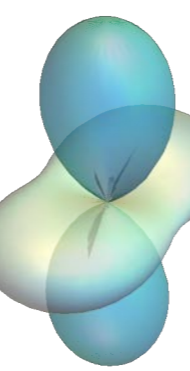

{-40., -80., 100}

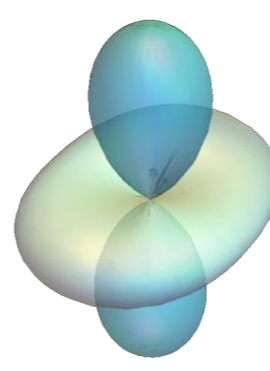

{-60., -80., 100}

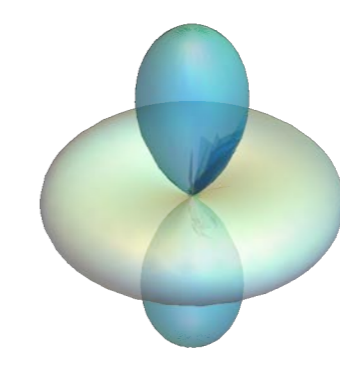

{-80., -80., 100}

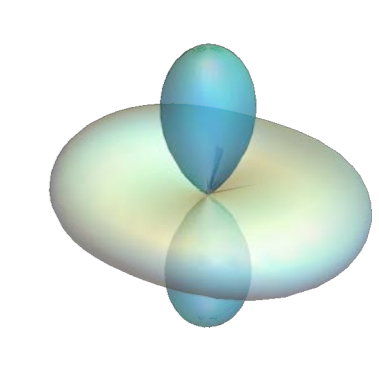

{-100., -80., 100}

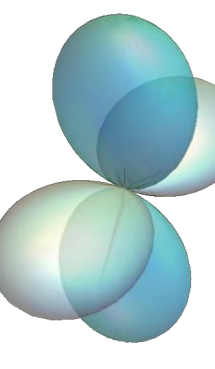

{0., -100., 100}

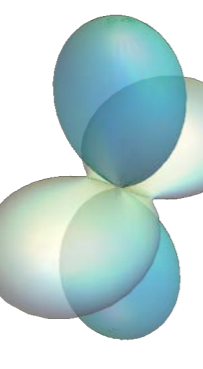

{-20., -100., 100}

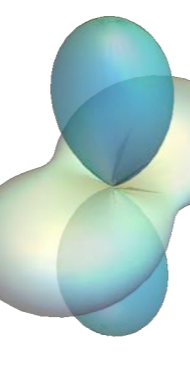

{-40., -100., 100}

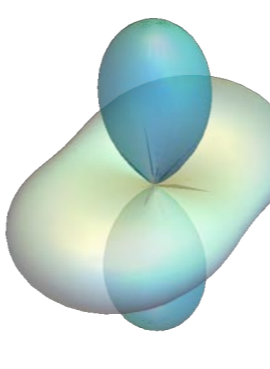

{-60., -100., 100}

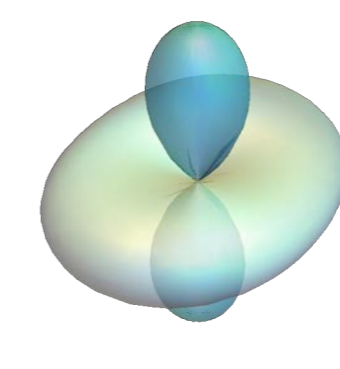

{-80., -100., 100}

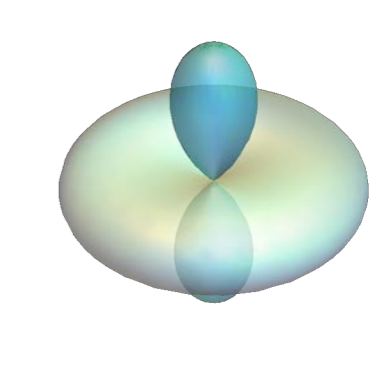

{-100., -100., 100}
